# Supplementary material for: Glycoblotting-Based Ovo-Sulphoglycomics Reveals Phosphorylated N-Glycans as a Possible Host Factor of AIV Prevalence in Waterfowls
Source: PubMed Central journal article supplement — ACS Infect Dis. 2024 Jan 4;10(2):650–61. doi: 10.1021/acsinfecdis.3c00520 (PMC10863614; doi:10.1021/acsinfecdis.3c00520), 2024-01-04
Supplement: id3c00520_si_001.pdf [file id3c00520_si_001.pdf]

## Supplementary Information for

### **Glycoblotting-Based Ovo-Sulphoglycomics Reveals Phosphorylated *N*-Glycans as a Possible Host-Factor of AIV Prevalence in Waterfowls**

Bryan M. Montalban<sup>†</sup> and Hiroshi Hinou<sup>\*,†,‡</sup>

<sup>†</sup> Laboratory of Advanced Chemical Biology, Graduate School of Life Science, Hokkaido University, Sapporo 001-0021, Japan

<sup>‡</sup> Frontier Research Center for Advanced Material and Life Science, Faculty of Advanced Life Science, Hokkaido University, Sapporo 001-0021, Japan

\*Corresponding author: Hiroshi Hinou, Email: [hinou@sci.hokudai.ac.jp](mailto:hinou@sci.hokudai.ac.jp)

Hiroshi Hinou

Frontier Research Center for Advanced Material and Life Science, Faculty of Advanced Life Science, Hokkaido University, Sapporo 001-0021, Japan

Email: [hinou@sci.hokudai.ac.jp](mailto:hinou@sci.hokudai.ac.jp)

#### Abbreviation:

|      |                                     |
|------|-------------------------------------|
| BOA  | benzyloxyamine                      |
| DABP | 3,4-diaminobenzophenone             |
| MTT  | 3-methyl-1- <i>p</i> -tolyltriazene |
| LVP  | low viral prevalence                |
| HVP  | high viral prevalence               |
| VIP  | variable importance to projection   |

Keywords: glycoblotting, ovo-sulphoglycomics, on-bead esterification, MTT, virus prevalence.

**Table S1.** The list of egg whites from various species of Order Anseriformes (4 families, 27 genera, 72 species) used in this study. Classification was based on Sibley's DNA-DNA hybridization.

| Sample ID | Scientific name                         | Family         | Sub-Family    | Common Name                  |
|-----------|-----------------------------------------|----------------|---------------|------------------------------|
| D1        | <i>Aix galericulata</i>                 | Anatidae       | Anatinae      | Mandarin Duck                |
| D2        | <i>Anas platyrhynchos</i>               | Anatidae       | Anatinae      | Mallard Duck                 |
| D3        | <i>Lophodytes cucullatus</i>            | Anatidae       | Anatinae      | Hooded Merganser             |
| D4        | <i>Aythya americana</i>                 | Anatidae       | Anatinae      | Red head                     |
| D5        | <i>Anas versicolor</i>                  | Anatidae       | Anatinae      | Silver Teal                  |
| D6        | <i>Anser anser</i>                      | Anatidae       | Anserinae     | Graylag Goose                |
| D7        | <i>Anser indicus</i>                    | Anatidae       | Anserinae     | Bar Headed Goose             |
| D8        | <i>Dendrocygna eytoni</i>               | Dendrocygnidae | Dendrocygnae  | Plumed Whistling Duck        |
| D9        | <i>Tadorna radjah</i>                   | Anatidae       | Anserinae     | White Headed Shelduck        |
| D10       | <i>Sarkidiornis melanotos</i>           | Anatidae       | Anserinae     | Knob-billed Goose            |
| D11       | <i>Anseranas semipalmata</i>            | Anseranatidae  | Anseranatidae | Maggie Goose                 |
| D12       | <i>Aix sponsa</i>                       | Anatidae       | Anatinae      | Wood Duck                    |
| D13       | <i>Alopochen aegyptiaca</i>             | Anatidae       | Anserinae     | Egyptian Goose               |
| D14       | <i>Anas platyrhynchos domesticus</i>    | Anatidae       | Anatinae      | White Call Duck              |
| D15       | <i>Anser anser domesticus (America)</i> | Anatidae       | Anserinae     | Buff Goose                   |
| D16       | <i>Anser anser domesticus (France)</i>  | Anatidae       | Anserinae     | Dewlap Toulouse Goose        |
| D17       | <i>Anser anser domesticus (Germany)</i> | Anatidae       | Anserinae     | Emdens Goose                 |
| D18       | <i>Anser canagicus</i>                  | Anatidae       | Anserinae     | Emperor Goose                |
| D19       | <i>Anser cygnoides domesticus</i>       | Anatidae       | Anserinae     | African Goose                |
| D20       | <i>Anser cygnoides domesticus</i>       | Anatidae       | Anserinae     | White China Goose            |
| D21       | <i>Anser cygnoides domesticus</i>       | Anatidae       | Anserinae     | Brown China Goose            |
| D22       | <i>Anser erythropus</i>                 | Anatidae       | Anserinae     | Lesser white-fronted Goose   |
| D23       | <i>Callonetta leucophrys</i>            | Anatidae       | Anatinae      | Ringed Teal                  |
| D24       | <i>Dendrocygna arborea</i>              | Dendrocygnidae | Dendrocygnae  | West Indian Whistling Duck   |
| D25       | <i>Lophonetta specularioides</i>        | Anatidae       | Anatinae      | Crested Duck                 |
| D26       | <i>Netta rufina</i>                     | Anatidae       | Anatinae      | Red Crested Pochard          |
| D27       | <i>Oxyura jamaicensis</i>               | Anatidae       | Oxyurinae     | Ruddy duck                   |
| D28       | <i>Chloephaga picta picta</i>           | Anatidae       | Anserinae     | Magellan Goose               |
| D29       | <i>Branta leucopsis</i>                 | Anatidae       | Anserinae     | Barnacle Goose               |
| D30       | <i>Branta sandvicensis</i>              | Anatidae       | Anserinae     | Hawaiian Goose               |
| D31       | <i>Anas gibberifrons</i>                | Anatidae       | Anatinae      | Indonesian Teal              |
| D32       | <i>Anas laysanensis</i>                 | Anatidae       | Anatinae      | Laysan Duck                  |
| D33       | <i>Anas luzonica</i>                    | Anatidae       | Anatinae      | Philippine Duck              |
| D34       | <i>Anas rubripes</i>                    | Anatidae       | Anatinae      | American Black Duck          |
| D35       | <i>Anas clypeata</i>                    | Anatidae       | Anatinae      | Northern Shoveler            |
| D36       | <i>Oxyura vittata</i>                   | Anatidae       | Oxyurinae     | Lake Duck                    |
| D37       | <i>Anas melleri</i>                     | Anatidae       | Anatinae      | Meller's Duck                |
| D38       | <i>Oxyura australis</i>                 | Anatidae       | Oxyurinae     | Blue-billed Duck             |
| D39       | <i>Branta canadensis maxima</i>         | Anatidae       | Anserinae     | Canada Goose                 |
| D40       | <i>Dendrocygna viduata</i>              | Dendrocygnidae | Dendrocygnae  | White-faced Whistling Duck   |
| D41       | <i>Anser brachyrhynchus</i>             | Anatidae       | Anserinae     | Pink-footed Goose            |
| D42       | <i>Chauna torquata</i>                  | Anhimidae      | Anhimidae     | Southern Screamer            |
| D43       | <i>Thalassornis leucotos</i>            | Dendrocygnidae | Dendrocygnae  | White-backed Duck            |
| D44       | <i>Tadorna tadornoides</i>              | Anatidae       | Anserinae     | Australian Shelduck          |
| D45       | <i>Chenonetta jubata</i>                | Anatidae       | Anatinae      | Australian Wood Duck         |
| D46       | <i>Somateria mollissima</i>             | Anatidae       | Anatinae      | Common Eider                 |
| D47       | <i>Anser albifrons</i>                  | Anatidae       | Anserinae     | Greater whitefronted Goose   |
| D48       | <i>Mergus serrator</i>                  | Anatidae       | Anatinae      | Red-breasted Merganser       |
| D49       | <i>Aythya affinis</i>                   | Anatidae       | Anatinae      | Lesser Scaup                 |
| D50       | <i>Dendrocygna autumnalis</i>           | Dendrocygnidae | Dendrocygnae  | Black-bellied whistling Duck |
| D51       | <i>Clangula hyemalis</i>                | Anatidae       | Anatinae      | Longtailed Duck              |
| D52       | <i>Anas discors</i>                     | Anatidae       | Anatinae      | Blue-winged Teal             |
| D53       | <i>Oxyura punctata</i>                  | Anatidae       | Oxyurinae     |                              |
| D54       | <i>Anas strepera</i>                    | Anatidae       | Anatinae      | Gadwall                      |
| D55       | <i>Heteronetta atricapilla</i>          | Anatidae       | Anatinae      | Black-headed Duck            |
| D56       | <i>Anas superciliosa</i>                | Anatidae       | Anatinae      | Pacific black Duck           |
| D57       | <i>Anser caerulescens</i>               | Anatidae       | Anserinae     | Snow Goose                   |
| D58       | <i>Aythya fuligula</i>                  | Anatidae       | Anatinae      | Tufted Duck                  |
| D59       | <i>Aythya ferina</i>                    | Anatidae       | Anatinae      | Common Pochard               |
| D60       | <i>Anas formosa</i>                     | Anatidae       | Anatinae      | Baikal Teal                  |

|     |                                    |                |                |                        |
|-----|------------------------------------|----------------|----------------|------------------------|
| D61 | <i>Dendrocygna bicolor</i>         | Dendrocygnidae | Dendrocygninae | Fulvous Whistling Duck |
| D62 | <i>Anas querquedula</i>            | Anatidae       | Anatinae       | Garganey               |
| D63 | <i>Malacorhynchus membranaceus</i> | Anatidae       | Anatinae       | Pink-eared Duck        |
| D64 | <i>Anas hottentota</i>             | Anatidae       | Anatinae       | Hottentot Teal         |
| D65 | <i>Anas georgica</i>               | Anatidae       | Anatinae       | Yellow-billed Pintail  |
| D66 | <i>Biziura lobata</i>              | Anatidae       | Oxyurinae      | Musk Duck              |
| D67 | <i>Cygnus atratus</i>              | Anatidae       | Cygninae       | Black swan             |
| D68 | <i>Aythya australis</i>            | Anatidae       | Anatinae       | Hardhead               |
| D69 | <i>Amazonetta brasiliensis</i>     | Anatidae       | Anatinae       | Brazilian Teal         |
| D70 | <i>Lophonetta cristata</i>         | Anatidae       | Anatinae       |                        |
| D71 | <i>Anas crecca</i>                 | Anatidae       | Anatinae       | Common Teal            |
| D72 | <i>Tadorna tadorna</i>             | Anatidae       | Anserinae      | Common Shelduck        |

**Table S2.** List of 89 acidic *N*-glycans identified from the egg whites of 72 waterfowl species. Glycan structures were inferred from glycan composition based on the observed monoisotopic masses.

| Glycan ID | Observed mass, m/z [M - H] <sup>-</sup> | Calculated Glycoform Mass [M - BOA] | Mass Error, ppm | Monosaccharide composition             | Glyconnect Database Links  |
|-----------|-----------------------------------------|-------------------------------------|-----------------|----------------------------------------|----------------------------|
| A1        | 1094.339                                | 972.274                             | -10.8           | Hex3 HexNAc2 Su1                       |                            |
| A2        | 1108.327                                | 972.284                             | -30.5           | Hex3 HexNAc2 Pho1                      | <a href="#">Glyconnect</a> |
| A3        | 1135.373                                | 1013.301                            | -4.2            | Hex2 HexNAc3 Su1                       |                            |
| A4        | 1149.392                                | 1013.310                            | 4.8             | Hex2 HexNAc3 Pho1                      |                            |
| A5        | 1256.320                                | 1134.327                            | -66.7           | Hex4 HexNAc2 Su1                       |                            |
| A6        | 1270.431                                | 1134.336                            | 14.1            | Hex4 HexNAc2 Pho1                      |                            |
| A7        | 1295.303                                | 1159.368                            | -109.5          | Hex2 HexNAc3 dHex1 Pho1                |                            |
| A8        | 1297.420                                | 1175.353                            | -7.5            | HexNAc1 Su1 + Man3 GlcNAc2             | <a href="#">Glyconnect</a> |
| A9        | 1311.445                                | 1175.363                            | 3.7             | HexNAc1 Pho1 + Man3 GlcNAc2            |                            |
| A10       | 1338.419                                | 1216.380                            | -28.2           | Hex2 HexNAc4 Su1                       |                            |
| A11       | 1352.412                                | 1216.390                            | -40.5           | Hex2 HexNAc4 Pho1                      |                            |
| A12       | 1418.430                                | 1296.380                            | -18.9           | Hex2 Su1 + Man3 GlcNAc2                |                            |
| A13       | 1432.469                                | 1293.389                            | 2.4             | Hex2 Pho1 + Man3 GlcNAc2               | <a href="#">Glyconnect</a> |
| A14       | 1441.498                                | 1305.426                            | -3.3            | Unknown structure                      |                            |
| A15       | 1443.485                                | 1321.411                            | -1.9            | HexNAc1 dHex1 Su1 + Man3 GlcNAc2       |                            |
| A16       | 1459.475                                | 1337.406                            | -5.3            | Hex1 HexNAc1 Su1 + Man3 GlcNAc2        |                            |
| A17       | 1473.505                                | 1337.416                            | 8.1             | Hex1 HexNAc1 Pho1 + Man3 GlcNAc2       |                            |
| A18       | 1500.497                                | 1378.433                            | -8.5            | HexNAc2 Su1 + Man3 GlcNAc2             | <a href="#">Glyconnect</a> |
| A19       | 1514.530                                | 1378.442                            | 7.5             | HexNAc2 Pho1 + Man3 GlcNAc2            |                            |
| A20       | 1580.496                                | 1458.432                            | -8.1            | Hex3 Su1 + Man3 GlcNAc2                | <a href="#">Glyconnect</a> |
| A21       | 1589.525                                | 1467.469                            | -13.1           | HexNAc1 dHex2 Su1 + Man3 GlcNAc2       |                            |
| A22       | 1594.528                                | 1458.442                            | 5.5             | Hex3 Pho1 + Man3 GlcNAc2               | <a href="#">Glyconnect</a> |
| A23       | 1603.574                                | 1467.479                            | 11.4            | HexNAc1 dHex2 Pho1 + Man3 GlcNAc2      |                            |
| A24       | 1605.533                                | 1483.464                            | -4.8            | Hex1 HexNAc1 dHex1 Su1 + Man3 GlcNAc2  | <a href="#">Glyconnect</a> |
| A25       | 1621.533                                | 1499.459                            | -1.7            | Hex2 HexNAc1 Su1 + Man3 GlcNAc2        |                            |
| A26       | 1635.542                                | 1499.469                            | -2.2            | Hex2 HexNAc1 Pho1 + Man3 GlcNAc2       |                            |
| A27       | 1646.558                                | 1524.491                            | -5.9            | HexNAc2 dHex1 Su1 + Man3 GlcNAc2       | <a href="#">Glyconnect</a> |
| A28       | 1662.556                                | 1540.486                            | -4.1            | Hex1 HexNAc2 Su1 + Man3 GlcNAc2        | <a href="#">Glyconnect</a> |
| A29       | 1676.605                                | 1540.495                            | 19.8            | Hex1 HexNAc2 Pho1 + Man3 GlcNAc2       |                            |
| A30       | 1703.584                                | 1581.512                            | -2.8            | HexNAc3 Su1 + Man3 GlcNAc2             | <a href="#">Glyconnect</a> |
| A31       | 1717.608                                | 1581.522                            | 5.6             | HexNAc3 Pho1 + Man3 GlcNAc2            |                            |
| A32       | 1749.602                                | 1613.537                            | -6.8            | Unknown structure                      |                            |
| A33       | 1751.599                                | 1629.522                            | 0.1             | Hex1 HexNAc1 dHex2 Su1 + Man3 GlcNAc2  |                            |
| A34       | 1764.667                                | 1628.502                            | 50.0            | Hex1 HexNAc1 NeuAc1 Su1 + Man3 GlcNAc2 |                            |
| A35       | 1765.618                                | 1629.532                            | 5.3             | Hex1 HexNAc1 dHex2 Pho1 + Man3 GlcNAc2 |                            |
| A36       | 1767.620                                | 1645.517                            | 14.8            | Hex2 HexNAc1 dHex1 Su1 + Man3 GlcNAc2  | <a href="#">Glyconnect</a> |
| A37       | 1783.585                                | 1661.512                            | -2.1            | Hex3 HexNAc1 Su1 + Man3 GlcNAc2        | <a href="#">Glyconnect</a> |
| A38       | 1792.814                                | 1670.549                            | 105.0           | HexNAc2 dHex2 Su1 + Man3 GlcNAc2       |                            |
| A39       | 1797.610                                | 1661.521                            | 6.6             | Hex3 HexNAc1 Pho1 + Man3 GlcNAc2       | <a href="#">Glyconnect</a> |
| A40       | 1806.657                                | 1670.558                            | 12.5            | HexNAc2 dHex2 Pho1 + Man3 GlcNAc2      |                            |
| A41       | 1808.607                                | 1686.544                            | -7.6            | Hex1 HexNAc2 dHex1 Su1 + Man3 GlcNAc2  | <a href="#">Glyconnect</a> |
| A42       | 1824.608                                | 1702.538                            | -3.7            | Hex2 HexNAc2 Su1 + Man3 GlcNAc2        | <a href="#">Glyconnect</a> |
| A43       | 1838.661                                | 1702.548                            | 19.5            | Hex2 HexNAc2 Pho1 + Man3 GlcNAc2       |                            |
| A44       | 1865.620                                | 1743.565                            | -11.7           | Hex1 HexNAc3 Su1 + Man3 GlcNAc2        | <a href="#">Glyconnect</a> |
| A45       | 1879.661                                | 1743.575                            | 4.8             | Hex1 HexNAc3 Pho1 + Man3 GlcNAc2       |                            |
| A46       | 1888.924                                | 1766.543                            | 161.1           | Hex4 dHex1 Su1 + Man3 GlcNAc2          |                            |
| A47       | 1906.655                                | 1784.592                            | -7.2            | HexNAc4 Su1 + Man3 GlcNAc2             | <a href="#">Glyconnect</a> |
| A48       | 1920.682                                | 1784.601                            | 2.3             | HexNAc4 Pho1 + Man3 GlcNAc2            |                            |
| A49       | 1945.612                                | 1823.565                            | -15.3           | Hex4 HexNAc1 Su1 + Man3 GlcNAc2        |                            |
| A50       | 1952.677                                | 1816.616                            | -7.9            | HexNAc2 dHex3 Pho1 + Man3 GlcNAc2      |                            |
| A51       | 1954.866                                | 1832.601                            | 96.3            | Hex1 HexNAc2 dHex2 Su1 + Man3 GlcNAc2  | <a href="#">Glyconnect</a> |
| A52       | 1959.599                                | 1823.574                            | -26.5           | Hex4 HexNAc1 Pho1 + Man3 GlcNAc2       | <a href="#">Glyconnect</a> |
| A53       | 1970.726                                | 1848.596                            | 26.9            | Hex2 HexNAc2 dHex1 Su1 + Man3 GlcNAc2  | <a href="#">Glyconnect</a> |
| A54       | 1986.667                                | 1864.591                            | -0.5            | Hex3 HexNAc2 Su1 + Man3 GlcNAc2        |                            |
| A55       | 2000.577                                | 1864.601                            | -50.2           | Hex3 HexNAc2 Pho1 + Man3 GlcNAc2       |                            |
| A56       | 2009.653                                | 1873.638                            | -30.7           | HexNAc3 dHex2 Pho1 + Man3 GlcNAc2      |                            |
| A57       | 2011.663                                | 1889.623                            | -18.1           | Hex1 HexNAc3 dHex1 Su1 + Man3 GlcNAc2  | <a href="#">Glyconnect</a> |
| A58       | 2027.682                                | 1905.618                            | -6.1            | Hex2 HexNAc3 Su1 + Man3 GlcNAc2        |                            |

|     |          |          |        |                                        |                            |
|-----|----------|----------|--------|----------------------------------------|----------------------------|
| A59 | 2041.713 | 1905.627 | 4.3    | Hex2 HexNAc3 Pho1 + Man3 GlcNAc2       |                            |
| A60 | 2050.704 | 1928.596 | 15.2   | Hex5 dHex1 Su1 + Man3 GlcNAc2          |                            |
| A61 | 2068.719 | 1946.644 | -1.0   | Hex1 HexNAc4 Su1 + Man3 GlcNAc2        |                            |
| A62 | 2082.738 | 1946.654 | 3.3    | Hex1 HexNAc4 Pho1 + Man3 GlcNAc2       |                            |
| A63 | 2109.758 | 1987.671 | 5.0    | HexNAc5 Su1 + Man3 GlcNAc2             | <a href="#">Glyconnect</a> |
| A64 | 2114.753 | 1978.669 | 3.4    | Hex1 HexNAc2 dHex3 Pho1 + Man3 GlcNAc2 |                            |
| A65 | 2129.999 | 1993.634 | 135.3  | Hex2 HexNAc2 NeuAc1 Su1 + Man3 GlcNAc2 | <a href="#">Glyconnect</a> |
| A66 | 2146.364 | 2010.659 | -173.2 | Hex3 HexNAc2 dHex1 Pho1 + Man3 GlcNAc2 |                            |
| A67 | 2148.660 | 2026.644 | -28.3  | Hex4 HexNAc2 Su1 + Man3 GlcNAc2        |                            |
| A68 | 2158.155 | 2035.681 | 184.1  | Hex1 HexNAc3 dHex2 Su1 + Man3 GlcNAc2  | <a href="#">Glyconnect</a> |
| A69 | 2171.782 | 2035.690 | 6.9    | Hex1 HexNAc3 dHex2 Pho1 + Man3 GlcNAc2 |                            |
| A70 | 2189.759 | 2067.671 | 5.1    | Hex3 HexNAc3 Su1 + Man3 GlcNAc2        |                            |
| A71 | 2203.771 | 2067.680 | 6.5    | Hex3 HexNAc3 Pho1 + Man3 GlcNAc2       |                            |
| A72 | 2212.764 | 2090.649 | 17.2   | Hex6 dHex1 Su1 + Man3 GlcNAc2          |                            |
| A73 | 2230.794 | 2108.697 | 8.8    | Hex2 HexNAc4 Su1 + Man3 GlcNAc2        |                            |
| A74 | 2244.834 | 2108.707 | 22.5   | Hex2 HexNAc4 Pho1 + Man3 GlcNAc2       |                            |
| A75 | 2271.838 | 2149.724 | 16.2   | Hex1 HexNAc5 Su1 + Man3 GlcNAc2        |                            |
| A76 | 2278.900 | 2156.707 | 51.0   | Hex3 HexNAc2 dHex2 Su1 + Man3 GlcNAc2  |                            |
| A77 | 2287.809 | 2165.744 | -5.2   | HexNAc3 dHex4 Su1 + Man3 GlcNAc2       |                            |
| A78 | 2320.103 | 2197.734 | 126.0  | Hex2 HexNAc3 dHex2 Su1 + Man3 GlcNAc2  |                            |
| A79 | 2374.818 | 2252.702 | 16.6   | Hex7 dHex1 Su1 + Man3 GlcNAc2          |                            |
| A80 | 2392.895 | 2270.750 | 28.3   | Hex3 HexNAc4 Su1 + Man3 GlcNAc2        |                            |
| A81 | 2406.937 | 2270.760 | 41.8   | Hex3 HexNAc4 Pho1 + Man3 GlcNAc2       |                            |
| A82 | 2433.956 | 2311.777 | 42.1   | Hex2 HexNAc5 Su1 + Man3 GlcNAc2        |                            |
| A83 | 2449.933 | 2327.797 | 24.4   | Hex1 HexNAc3 dHex4 Su1 + Man3 GlcNAc2  |                            |
| A84 | 2479.957 | 2343.801 | 31.9   | Hex2 HexNAc3 dHex3 Pho1 + Man3 GlcNAc2 |                            |
| A85 | 2555.030 | 2432.803 | 58.9   | Hex4 HexNAc4 Su1 + Man3 GlcNAc2        |                            |
| A86 | 2569.031 | 2432.812 | 55.4   | Hex4 HexNAc4 Pho1 + Man3 GlcNAc2       |                            |
| A87 | 2596.066 | 2473.829 | 61.6   | Hex3 HexNAc5 Su1 + Man3 GlcNAc2        |                            |
| A88 | 2758.164 | 2635.882 | 74.5   | Hex4 HexNAc5 Su1 + Man3 GlcNAc2        |                            |
| A89 | 2920.151 | 2797.935 | 47.7   | Hex5 HexNAc5 Su1 + Man3 GlcNAc2        |                            |

\*Monosaccharide nomenclatures are based on the SNFG: Hexose (Hex), *N*-acetyl hexosamine (HexNAc), Mannose (Man), *N*-acetyl glucosamine (GlcNAc), Fucose (dHex), Sulfate (Su), and Phosphate (Pho). The number of units corresponding to each monosaccharide are indicated after each abbreviation.

\*The links to the Glyconnect database of the Swiss Institute of Bioinformatics are provided for selected monoisotopic peaks found in the database.

\*From the 89 monoisotopic masses, 55 sulfated and 34 phosphorylated *N*-glycans were identified based on their glycan composition and MS/MS analysis. Fucosylated acidic *N*-glycan structures were also found in trace abundance relative to un-fucosylated acidic *N*-glycans.

\*Glycoform mass is the mass of unlabeled *N*-glycan structure denoted as [M-BOA], BOA is benzyloxyamine with a molecular mass of 123.0684 Da.

**Table S3.** List of acidic *N*-glycans that gave the variation between groups in PCA.

| PCA Group No. | Glycan ID | Observed mass, $m/z$ [M-H] <sup>-</sup> | <sup>1</sup> Glycan composition | Probable structures | <sup>2</sup> trans-Gal structure type |
|---------------|-----------|-----------------------------------------|---------------------------------|---------------------|---------------------------------------|
| 1             | A6        | 1270.431                                | Hex1 PMe1 + Core                |                     | trans-Gal(-)                          |
|               | A22       | 1594.528                                | Hex3 PMe1 + Core                |                     | trans-Gal(-)                          |
|               | A37       | 1783.585                                | Hex3 HexNAc1 Su1 + Core         |                     | trans-Gal(+)                          |
|               | A39       | 1797.610                                | Hex3 HexNAc1 PMe1 + Core        |                     | trans-Gal(+)                          |
| 2             | A3        | 1135.373                                | Hex2 HexNAc3 Su1                |                     | trans-Gal(-)                          |
|               | A8        | 1297.420                                | HexNAc1 Su1 + Core              |                     | trans-Gal(-)                          |
|               | A16       | 1459.475                                | Hex1 HexNAc1 Su1 + Core         |                     | trans-Gal(-)                          |
|               | A18       | 1500.497                                | HexNAc2 Su1 + Core              |                     | trans-Gal(-)                          |
|               | A25       | 1621.533                                | Hex2 HexNAc1 Su1 + Core         |                     | trans-Gal(-)                          |
|               | A28       | 1662.556                                | Hex1 HexNAc2 Su1 + Core         |                     | trans-Gal(+)                          |
|               | A30       | 1703.584                                | HexNAc3 Su1 + Core              |                     | trans-Gal(-)                          |
|               | A44       | 1865.620                                | Hex1 HexNAc3 Su1 + Core         |                     | trans-Gal(+)                          |
| 3             | A42       | 1824.608                                | Hex2 HexNAc2 Su1 + Core         |                     | trans-Gal(+)                          |
|               | A47       | 1906.655                                | HexNAc4 Su1 + Core              |                     | trans-Gal(-)                          |
|               | A58       | 2027.682                                | Hex2 HexNAc3 Su1 + Core         |                     | trans-Gal(+)                          |
|               | A61       | 2068.719                                | Hex1 HexNAc4 Su1 + Core         |                     | trans-Gal(+)                          |
|               | A70       | 2189.759                                | Hex3 HexNAc3 Su1 + Core         |                     | trans-Gal(+)                          |
|               | A73       | 2230.794                                | Hex2 HexNAc4 Su1 + Core         |                     | trans-Gal(+)                          |
|               | A80       | 2392.895                                | Hex3 HexNAc4 Su1 + Core         |                     | trans-Gal(+)                          |
|               | A85       | 2555.030                                | Hex4 HexNAc4 Su1 + Core         |                     | trans-Gal(+)                          |

<sup>1</sup>Monosaccharide nomenclatures are based on the SNFG: Hexose (Hex), *N*-acetyl hexosamine (HexNAc), Sulfate (Su), methylated Phosphate (PMe) and *N*-glycan core Man3GlcNAc2 (Core). The number of units corresponding to each monosaccharide are indicated after each abbreviation.

<sup>2</sup>The definition of trans-Gal(+/-) classifications were based on Hirose, *et al.*[1]

**Table S4. GenBank accession numbers for various genes of the 72 Anseriformes species in this study.**

| Sample ID | Scientific name                         | CO1      | Cty <i>b</i> | ND2       | Complete mtDNA |
|-----------|-----------------------------------------|----------|--------------|-----------|----------------|
| D01       | <i>Aix galericulata</i>                 | JN703260 | EU585604     | EU585667  | KF437906       |
| D02       | <i>Anas platyrhynchos</i>               | Mk262361 | EU585609     | EU585672  | MN720361       |
| D03       | <i>Lophodytes cucullatus</i>            |          | EU585650     | EU585713  |                |
| D04       | <i>Aythya americana</i>                 | DQ434316 | NC 000877    | NC 000877 | NC 000877      |
| D05       | <i>Anas versicolor</i>                  | FJ027121 | AF059094     | AF059154  |                |
| D06       | <i>Anser anser</i>                      | GU571243 | EU585613     | EU585676  | NC 011196      |
| D07       | <i>Anser indicus</i>                    | GU571246 | EU585619     | EU585682  | NC 025654      |
| D08       | <i>Dendrocygna eytoni</i>               | MZ153330 | EU585647     | EU585710  |                |
| D09       | <i>Tadorna radjah</i>                   |          | EU585665     | EU585728  |                |
| D10       | <i>Sarkidiornis melanotos</i>           | FJ028237 | EU585660     | EU585723  |                |
| D11       | <i>Anseranas semipalmata</i>            | MN356217 | NC 005933    |           | MN356217       |
| D12       | <i>Aix sponsa</i>                       | AY666569 | EU585605     | EU585668  |                |
| D13       | <i>Alopochen aegyptiaca</i>             | Mf580159 | EU585606     | EU585669  |                |
| D14       | <i>Anas platyrhynchos domesticus</i>    |          |              |           |                |
| D15       | <i>Anser anser domesticus (America)</i> |          |              |           |                |
| D16       | <i>Anser anser domesticus (France)</i>  |          |              |           |                |
| D17       | <i>Anser anser domesticus (Germany)</i> |          |              |           |                |
| D18       | <i>Anser canagica</i>                   | DQ432849 | EU585615     | EU585678  |                |
| D19       | <i>Anser cygnoides domesticus</i>       | LC145060 | EU585616     | EU585679  | NC 023832      |
| D20       | <i>Anser cygnoides domesticus</i>       |          |              |           |                |
| D21       | <i>Anser cygnoides domesticus</i>       |          |              |           |                |
| D22       | <i>Anser erythropus</i>                 | GU571729 | EU161871     | EU585680  |                |
| D23       | <i>Callonetta leucophrys</i>            | FJ027277 | EU914157     | AF059157  |                |
| D24       | <i>Dendrocygna arborea</i>              |          |              |           |                |
| D25       | <i>Lophonetta specularioides</i>        | JN801488 | AF059102     | AF059162  |                |
| D26       | <i>Netta rufina</i>                     | GQ482234 | EU585657     | EU585720  | NC 024922      |
| D27       | <i>Oxyura jamaicensis</i>               | AY666448 | EU585658     | EU585721  | MW574354       |
| D28       | <i>Chloephaga picta</i>                 | FJ027353 | AF515262     | AF515266  |                |
| D29       | <i>Branta leucopsis</i>                 | GU571283 | EU585630     | EU585693  |                |
| D30       | <i>Branta sandvicensis</i>              | JF498832 | EU585632     | EU585695  |                |
| D31       | <i>Anas gibberifrons</i>                | JQ174015 | AF059076     | AF059136  |                |
| D32       | <i>Anas laysanensis</i>                 | JF498830 | AF059078     | AF059138  |                |
| D33       | <i>Anas luzonica</i>                    | KT151721 | AF059079     | AF059139  |                |
| D34       | <i>Anas rubripes</i>                    | AY666211 | AF059088     | AF059148  |                |
| D35       | <i>Anas clypeata</i>                    | GU571236 | AF059062     | AF059122  | NC 028346      |
| D36       | <i>Oxyura vittata</i>                   | JQ175648 | EU585659     | EU585722  |                |
| D37       | <i>Anas melleri</i>                     |          | AF059080     | AF059140  |                |
| D38       | <i>Oxyura australis</i>                 |          | AF119167     | AY747867  |                |
| D39       | <i>Branta canadensis</i>                | GU571280 | EU585629     | EU585692  | NC 007011      |
| D40       | <i>Dendrocygna viduata</i>              | FJ027502 | EU585649     | EU585712  |                |
| D41       | <i>Anser brachyrhynchus</i>             | GU571244 | EU585614     | EU585677  |                |
| D42       | <i>Chauna torquata</i>                  | AY140730 | AY274030     | AY274053  | NC 052807      |
| D43       | <i>Thalassornis leuconotos</i>          | U97738   |              |           |                |
| D44       | <i>Tadorna tadornoides</i>              |          | EU585666     | EU585729  |                |
| D45       | <i>Chenonetta jubata</i>                | JN801436 | AF059100     | AF059160  |                |
| D46       | <i>Somateria mollissima</i>             | GU571620 | EU585661     | EU585724  | MW849292       |
| D47       | <i>Anser albifrons</i>                  | DQ433314 | EU585612     | EU585675  | NC 004539      |
| D48       | <i>Mergus serrator</i>                  | GU571482 | EU585655     | EU585718  | MZ365040       |
| D49       | <i>Aythya affinis</i>                   | DQ434308 | EU585621     | EU585684  |                |
| D50       | <i>Dendrocygna autumnalis</i>           | FJ027495 |              |           |                |
| D51       | <i>Clangula hyemalis</i>                | GU571339 | EU585638     | EU585701  | MW849278       |
| D52       | <i>Anas discors</i>                     | AY666325 | EU914146     | AF059128  |                |
| D53       | <i>Oxyura punctata</i>                  |          |              |           |                |
| D54       | <i>Anas strepera (Mareca strepera)</i>  | GQ481327 | EU574791     | AF059169  | NC 045373      |
| D55       | <i>Heteronetta atricapilla</i>          | FJ027649 |              |           |                |

|     |                                        |           |          |          |           |
|-----|----------------------------------------|-----------|----------|----------|-----------|
| D56 | <i>Anas superciliosa</i>               | JN801396  | AF059092 | AF059152 |           |
| D57 | <i>Anser caerulescens</i>              | DQ434537  | FJ423758 |          |           |
| D58 | <i>Aythya fuligula</i>                 | JF499099  | KU697802 | EU585687 | NC 024595 |
| D59 | <i>Aythya ferina</i>                   | JF499098  | EU585623 | EU585686 | NC 024602 |
| D60 | <i>Anas formosa</i>                    | JN703250  | AF059073 | AF059133 | NC 015482 |
| D61 | <i>Dendrocygna bicolor</i>             |           | EU585646 | EU585709 |           |
| D62 | <i>Anas querquedula</i>                | GQ481326  | EU585610 | EU585673 |           |
| D63 | <i>Malacorhynchus membranaceus</i>     |           | EU585651 | EU585714 |           |
| D64 | <i>Anas hottentota (Anas punctata)</i> |           | EU585608 | EU585671 |           |
| D65 | <i>Anas georgica</i>                   | FJ027096  | AF059075 | AF059135 |           |
| D66 | <i>Biziura lobata</i>                  |           | EU585627 | EU585690 |           |
| D68 | <i>Cygnus atratus</i>                  | NC 012843 | EU585641 | EU585704 | NC 012843 |
| D67 | <i>Aythya australis</i>                | MW151626  | EU585622 | EU585685 |           |
| D69 | <i>Amazonetta brasiliensis</i>         | FJ027059  | AF059054 | AF059115 |           |
| D70 | <i>Lophonetta cristata</i>             |           |          |          |           |
| D71 | <i>Anas crecca</i>                     | KC771255  | AF059064 | EU585670 | NC 022452 |
| D72 | <i>Tadorna tadorna</i>                 | KU140668  | AF059113 | AF059173 | NC 024750 |
| OG1 | <i>Gallus gallus</i>                   |           | AF195631 |          | NC 040902 |
| OG2 | <i>Struthio camelus</i>                | LC145063  | MZ545713 |          | NC 002785 |

\*Accession numbers of the mitochondrial gene sequences of the cytochrome *b* (Cty *b*), cytochrome oxidase subunit 1 (CO1), NADH dehydrogenase subunit 2 (ND2) and the complete mitochondrial DNA (mtDNA) was taken from GenBank.



**Table S5. Waterfowl classification based on their virus prevalence (VP).**

| <b>Sample ID</b> | <b>Species</b>             | <b>Sub-family Classification</b> | <b>PCA Group</b> | <b>VP Values</b> | <b>VP Classification</b> |
|------------------|----------------------------|----------------------------------|------------------|------------------|--------------------------|
| D2               | <i>Anas platyrhynchos</i>  | Anatinae                         | 1                | 12.9             | HVP                      |
| D56              | <i>Anas superciliosa</i>   | Anatinae                         | 2                | 5.7              | HVP                      |
| D34              | <i>Anas rubripes</i>       | Anatinae                         | 2                | 18.1             | HVP                      |
| D71              | <i>Anas creeca</i>         | Anatinae                         | 2                | 4.0              | LVP                      |
| D31              | <i>Anas gibberifrons</i>   | Anatinae                         | 2                | 5.8              | HVP                      |
| D54              | <i>Anas strepera</i>       | Anatinae                         | 2                | 1.5              | LVP                      |
| D52              | <i>Anas discors</i>        | Anatinae                         | 1                | 11.2             | HVP                      |
| D45              | <i>Chenonetta jubata</i>   | Anatinae                         | 2                | 2.0              | LVP                      |
| D12              | <i>Aix sponsa</i>          | Anatinae                         | 2                | 2.2              | LVP                      |
| D68              | <i>Aythya australis</i>    | Anatinae                         | 2                | 2.8              | LVP                      |
| D72              | <i>Tadorna tadorna</i>     | Anatinae                         | 2                | 6.5              | HVP                      |
| D44              | <i>Tadorna tadornoides</i> | Anatinae                         | 2                | 5.0              | LVP                      |
| D63              | <i>M. Membranaceus</i>     | Anatinae                         | 1                | 6.3              | HVP                      |
| D39              | <i>Branta canadensis</i>   | Anserinae                        | 3                | 0.8              | LVP                      |
| D47              | <i>Anser albifrons</i>     | Anserinae                        | 2                | 2.2              | LVP                      |
| D06              | <i>Anser anser</i>         | Anserinae                        | 3                | 1.1              | LVP                      |

\*Each waterfowl species was classified either as a high virus prevalence (HVP) or low virus prevalence (LVP). Classification was based on the average virus prevalence (5.5%). LVP < 5.50% < HVP.

\*Virus prevalence data of the 16 species shown on the table was taken from the work of Wille, M. *et al.* [2] and Olsen, B. *et al.* [3].



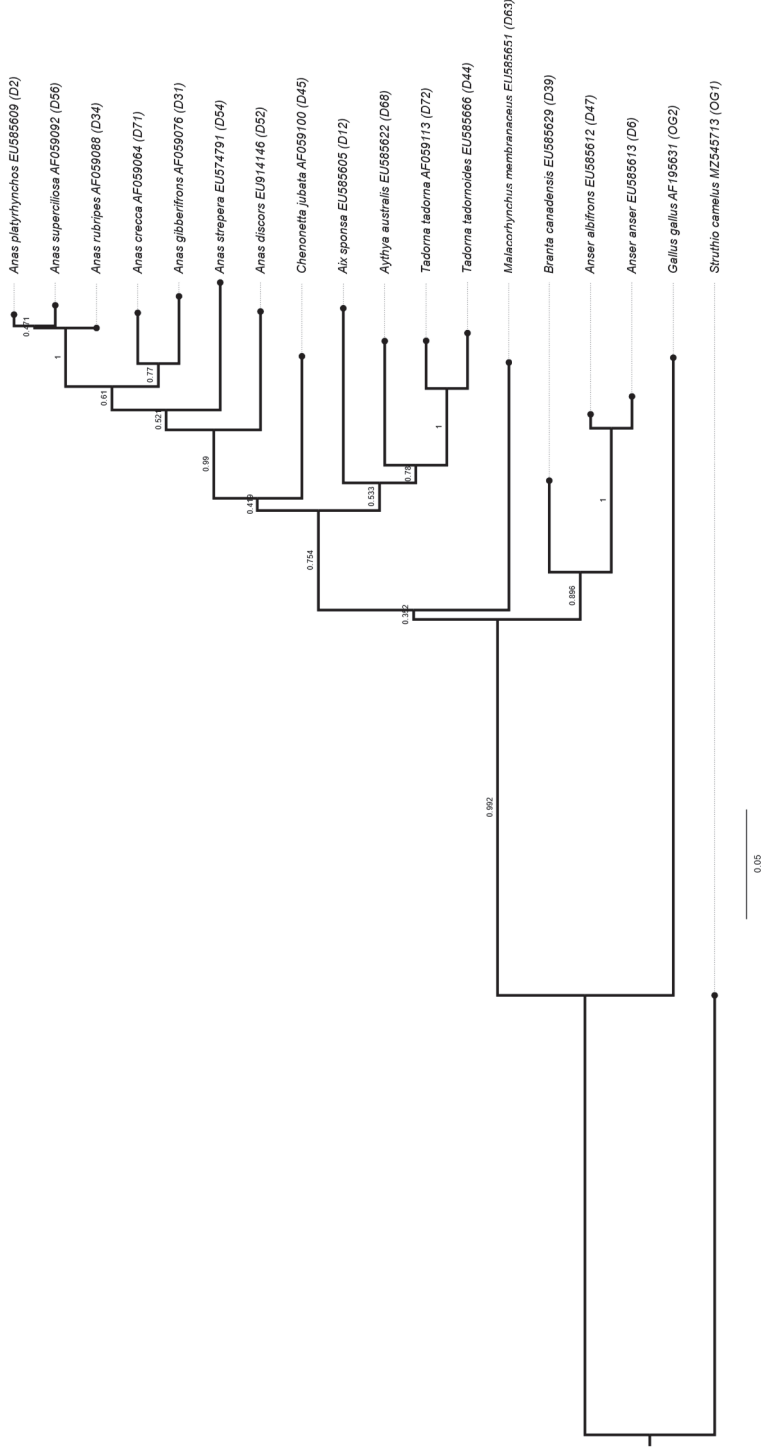

**Figure S2.** The evolutionary history was inferred by using the Maximum Likelihood method and Tamura-Nei model. The tree with the highest log likelihood (-5786.80) is shown. The percentage of trees in which the associated taxa clustered together is shown below the branches. Initial tree(s) for the heuristic search were obtained automatically by applying Neighbor-Join and BioNJ algorithms to a matrix of pairwise distances estimated using the Tamura-Nei model, and then selecting the topology with superior log likelihood value. A discrete Gamma distribution was used to model evolutionary rate differences among sites (5 categories (+G, parameter = 0.3642)). The tree is drawn to scale, with branch lengths measured in the number of substitutions per site. This analysis involved 18 nucleotide sequences. There were a total of 1082 positions in the final dataset. Evolutionary analyses were conducted in MEGA11.

## References

- [1] Hirose, K., Amano, M., Hashimoto, R., Lee, Y.C., Nishimura, S.I., Insight into glycan diversity and evolutionary lineage based on comparative avio-N-glycomics and sialic acid analysis of 88 egg whites of galloanserae. *Biochemistry* 2011, 50, 4757–4774.
- [2] Wille, M., Lisovski, S., Roshier, D., Ferenczi, M., et al., Strong host phylogenetic and ecological effects on host competency for avian influenza in Australian wild birds. *Proceedings of the Royal Society B: Biological Sciences* 2023, 290, 1–9.
- [3] Olsen, B., Munster, V.J., Wallensten, A., Waldenström, J., et al., Global Patterns of Influenza A Virus in Wild Birds. *Science (1979)* 2006, 312, 384–388.
